# Supplementary material for: Charge photogeneration and recombination dynamics in non-fullerene solar cells based on a polymer donor with a mono-fluorinated π-bridge
Source: Royal Society of Chemistry journal article supplement (doi:10.1039/d4cp02014f), 2024-01-01
Supplement: d4cp02014f1.pdf [file d4cp02014f1.pdf]

# Supporting Information

## Charge photogeneration and recombination dynamics in non-fullerene solar cells based on a polymer donor with mono-fluorinated $\pi$ -bridge

Haobo Lin,<sup>a,b</sup> Zijie Xiao,<sup>a</sup> Chuan Chen,<sup>a</sup> Zekai Cai,<sup>a</sup> Yuan Liang<sup>\*c</sup> and Wei Zhang<sup>\*a,b</sup>

<sup>a</sup> School of Physics and Materials Science, Guangzhou University, Guangzhou 510006, China

<sup>b</sup> Research Center for Advanced Information Materials (CAIM), Huangpu Research and Graduate School of Guangzhou University, Guangzhou 510006, China

<sup>c</sup> School of Electronics and Communication Engineering, Guangzhou University, Guangzhou, 510006 China

\* Correspondence: wzhang@gzhu.edu.cn (W.Z.); yliang017@e.ntu.edu.sg (Y. L.)

# Content

|                                                                                                                                                                                                                                                                                  |    |
|----------------------------------------------------------------------------------------------------------------------------------------------------------------------------------------------------------------------------------------------------------------------------------|----|
| SI. The detailed calculation about exciton dissociation efficiency in blend films based on steady state spectroscopy measurements .....                                                                                                                                          | 4  |
| Table SI. The exciton-exciton annihilation coefficient ( $\gamma$ ), exciton lifetime ( $\tau$ ), exciton diffusion length ( $L_{3d}$ and $L_d$ ) and exciton diffusion coefficient ( $D$ ) of PTzBI- <i>d</i> F and PTzBI-Cl films.....                                         | 6  |
| Table SII. The detailed parameters for the fitting of early time TA kinetics of PTzBI- <i>d</i> F:Y6 blend films at ~650 nm after 800 nm excitation, with an excitation fluence of $1.5 \times 10^{13}$ photons·cm <sup>-2</sup> ·pulse <sup>-1</sup> .....                      | 7  |
| Table SIII. The detailed parameters for the fitting of early time TA kinetics of PTzBI- <i>d</i> F:Y6 blend films at ~845 nm after 400 nm excitation, with an excitation fluence of $2.1 \times 10^{13}$ photons·cm <sup>-2</sup> ·pulse <sup>-1</sup> .....                     | 8  |
| Table SIV. The detailed parameters for the fitting of charge recombination kinetics of PTzBI- <i>d</i> F:Y6 blend films with and without thermal annealing at the probing wavelength of ~650 nm after photoexcitation at 800 nm with various excitation fluences. ....           | 9  |
| Table SV. The detailed parameters for the fitting of charge recombination kinetics of PTzBI-Cl:Y6 blend films at the probing wavelength of ~630 nm after photoexcitation at 800 nm with various excitation fluences.....                                                         | 10 |
| Figure S1. The excitation spectra of Y6 film at the probing wavelength of ~925 nm and ~1025 nm. ....                                                                                                                                                                             | 11 |
| Figure S2. (a) Extracted emission bands of PL spectra of neat PTzBI- <i>d</i> F film at varies temperatures with three Gaussian-peaks fitting after excitation at 532 nm. (b) The correlations between PL emission peak positions and $1/T$ for neat PTzBI- <i>d</i> F film..... | 12 |
| Figure S3. The molecule structure of PTzBI-Cl.....                                                                                                                                                                                                                               | 12 |
| Figure S4. TA kinetics of PTzBI-Cl film probing at ~830 nm under indicated excitation fluences.....                                                                                                                                                                              | 13 |
| Figure S5. The charge recombination kinetics for PTzBI- <i>d</i> F:Y6 and PTzBI-Cl:Y6 blend films with various excitation fluences. ....                                                                                                                                         | 14 |
| Figure S6. Morphology domains in PTzBI- <i>d</i> F:Y6 film. ....                                                                                                                                                                                                                 | 15 |
| Figure S7. After excitation at 800 nm, TA kinetics of PTzBI- <i>d</i> F:Y6 films with and without thermal annealing at the probe wavelength of ~650 nm with an excitation fluence of $1.5 \times 10^{14}$ photons·cm <sup>-2</sup> ·pulse <sup>-1</sup> . ....                   | 16 |

Figure S8. Charge recombination kinetics at the probe wavelength of  $\sim 845$  nm for PTzBI-*d*F:Y6 blend films after photoexcitation at 400 nm with various excitation fluences. The excitation fluences are  $2.1 \times 10^{13}$  and  $1.5 \times 10^{14}$  photons $\cdot$ cm $^{-2}$  $\cdot$ pulse $^{-1}$ . .....17

References .....18

**SI.** The detailed calculation about exciton dissociation efficiency in blend films based on steady state spectroscopy measurements

When calculating the exciton dissociation efficiency using steady-state spectroscopy, it was ensured that the test conditions for both the blended film and the neat acceptor film were identical.

For the measurement of PL of acceptor in neat and blend films, an excitation wavelength of 780 nm was employed for selectively exciting the acceptor in neat and blended films. Taking into the absorption of neat acceptor film and the blend film at 780 nm, the number of photons absorbed by the acceptor in neat acceptor film ( $n_{Abs}^{neat}$ ) and the blend film ( $n_{Abs}^{blend}$ ) can be determined as

$$n_{Abs}^{neat} = N \cdot (1 - 10^{-A_{neat}}) \#(1)$$

$$n_{Abs}^{blend} = N \cdot (1 - 10^{-A_{blend}}) \#(2)$$

where  $N$  is the number of photons for the excitation light,  $A_{neat}$  and  $A_{blend}$  represent the absorbance of neat acceptor and blend films at 780 nm, respectively. Assuming the PL quenching efficiency of the acceptor exciton in the blend film is  $\eta$ , the PL quantum yield of neat acceptor film is  $Q$ . Then, the number of emitted photons for acceptor in neat ( $n_{neat PL}^{ex 780}$ ) and blend ( $n_{blend PL}^{ex 780}$ ) films after excitation at 780 nm can be expressed as

$$n_{neat PL}^{ex 780} = n_{Abs}^{neat} \cdot Q \#(3)$$

$$n_{blend PL}^{ex 780} = n_{Abs}^{blend} \cdot (1 - \eta) \cdot Q \#(4)$$

From equations (3) and (4),  $\eta$  can be extracted as

$$\eta = 1 - \frac{n_{blend PL}^{ex 780}}{n_{Abs}^{blend}} \cdot \frac{n_{Abs}^{neat}}{n_{neat PL}^{ex 780}} = 1 - \frac{1 - 10^{-A_{neat}}}{1 - 10^{-A_{blend}}} \cdot \frac{n_{blend PL}^{ex 780}}{n_{neat PL}^{ex 780}} \#(5)$$

where  $\frac{1 - 10^{-A_{neat}}}{1 - 10^{-A_{blend}}}$  can be determined by measuring absorbance of neat acceptor and blend films at

780 nm,  $\frac{n_{blend PL}^{ex 780}}{n_{neat PL}^{ex 780}}$  can be determined by the ratio of integrated PL intensity of acceptor material in the blend and neat films after excitation at 780 nm.

To determine the exciton dissociation efficiency of donor in blend films, an excitation wavelength of 532 nm is elected for the PL measurement of neat donor and blend films. At this wavelength, both donor and acceptor in the blend films can be excited. Therefore, compared to the measurement of exciton dissociation efficiency of acceptor above, an additional process is required to determine the proportion of donor absorption in the blend film. By normalizing absorption spectrum of neat acceptor film and blend film at 850 nm (the main absorption peak of neat acceptor film), the proportion of donor absorption in the blend film can be determined as

$$1 - \frac{A_{acceptor}}{A_{blend}} \quad \# (6)$$

where  $A_{acceptor}$  and  $A_{blend}$  are the absorption of neat acceptor film and blend film at 532 nm. The detailed calculation can be found in the reference <sup>1</sup>.

**Table SI.** The exciton-exciton annihilation coefficient ( $\gamma$ ), exciton lifetime ( $\tau$ ), exciton diffusion length ( $L_{3d}$  and  $L_d$ ) and exciton diffusion coefficient ( $D$ ) of PTzBI-*d*F and PTzBI-Cl films.

| <b>Material</b>   | <b><math>\gamma</math> (<math>\text{cm}^3 \cdot \text{s}^{-1}</math>)</b> | <b><math>\tau</math> (ps)</b> | <b><math>L_{3d}</math> (nm)</b> | <b><math>L_d</math> (nm)</b> | <b><math>D</math> (<math>\text{cm}^2 \cdot \text{s}^{-1}</math>)</b> |
|-------------------|---------------------------------------------------------------------------|-------------------------------|---------------------------------|------------------------------|----------------------------------------------------------------------|
| PTzBI- <i>d</i> F | $1.4 \times 10^{-8}$                                                      | 327.8                         | 33.5                            | 13.7                         | $5.7 \times 10^{-3}$                                                 |
| PTzBI-Cl          | $6.9 \times 10^{-9}$                                                      | 281                           | 21.5                            | 8.8                          | $2.7 \times 10^{-3}$                                                 |

**Table SII.** The detailed parameters for the fitting of early time TA kinetics of PTzBI-*d*F:Y6 blend films at ~650 nm after 800 nm excitation, with an excitation fluence of  $1.5 \times 10^{13}$  photons·cm<sup>-2</sup>·pulse<sup>-1</sup>.

| Active layers        | $A_1$ | $\tau_1$ (ps) | $A_2$ | $\tau_2$ (ps) |
|----------------------|-------|---------------|-------|---------------|
| PTzBI- <i>d</i> F:Y6 | 0.48  | IRF           | 0.44  | 17.1          |

IRF: Instrument Response Function

**Table SIII.** The detailed parameters for the fitting of early time TA kinetics of PTzBI-*d*F:Y6 blend films at ~845 nm after 400 nm excitation, with an excitation fluence of  $2.1 \times 10^{13}$  photons·cm<sup>-2</sup>·pulse<sup>-1</sup>.

| Active layers        | $A_1$ | $\tau_1$ (ps) | $A_2$ | $\tau_2$ (ps) |
|----------------------|-------|---------------|-------|---------------|
| PTzBI- <i>d</i> F:Y6 | 0.69  | IRF           | 0.20  | 1.7           |

IRF: Instrument Response Function



**Table SIV.** The detailed parameters for the fitting of charge recombination kinetics of PTzBI-*d*F:Y6 blend films with and without thermal annealing at the probing wavelength of ~650 nm after photoexcitation at 800 nm with various excitation fluences.

| <b>Active layer</b>       | <b>Excitation fluence<br/>(photons·cm<sup>-2</sup>·pulse<sup>-1</sup>)</b> | <b><i>A</i></b> | <b><math>\tau</math> (ps)</b> |
|---------------------------|----------------------------------------------------------------------------|-----------------|-------------------------------|
| Without thermal annealing | $1.5 \times 10^{13}$                                                       | 0.82            | 5248                          |
| With thermal annealing    | $1.5 \times 10^{13}$                                                       | 0.81            | 5402                          |
| Without thermal annealing | $1.5 \times 10^{14}$                                                       | 0.45            | 3091                          |
| With thermal annealing    | $1.5 \times 10^{14}$                                                       | 0.48            | 3353                          |

**Table SV.** The detailed parameters for the fitting of charge recombination kinetics of PTzBI-Cl:Y6 blend films at the probing wavelength of  $\sim 630$  nm after photoexcitation at 800 nm with various excitation fluences.

| Active layer | Excitation fluence<br>(photons $\cdot$ cm $^{-2}$ $\cdot$ pulse $^{-1}$ ) | $A$  | $\tau$ (ps) |
|--------------|---------------------------------------------------------------------------|------|-------------|
| PTzBI-Cl:Y6  | $7.7 \times 10^{13}$                                                      | 0.66 | 4320        |
| PTzBI-Cl:Y6  | $7.7 \times 10^{14}$                                                      | 0.26 | 2723        |

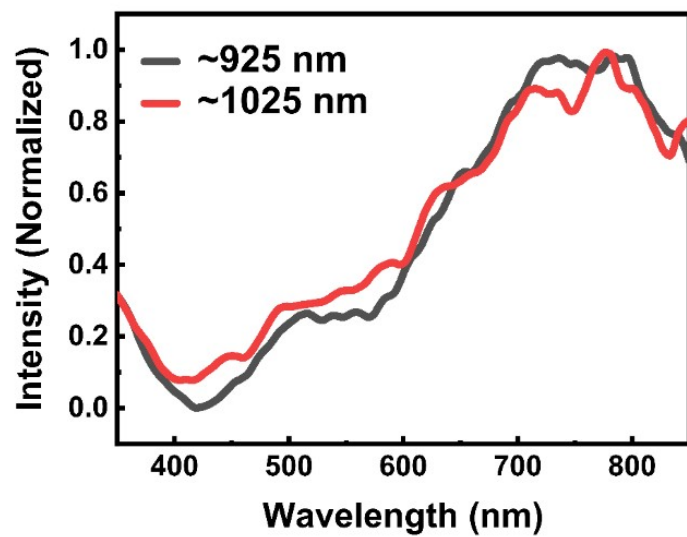

**Figure S1.** The excitation spectra of Y6 film at the probing wavelength of ~925 nm and ~1025 nm.

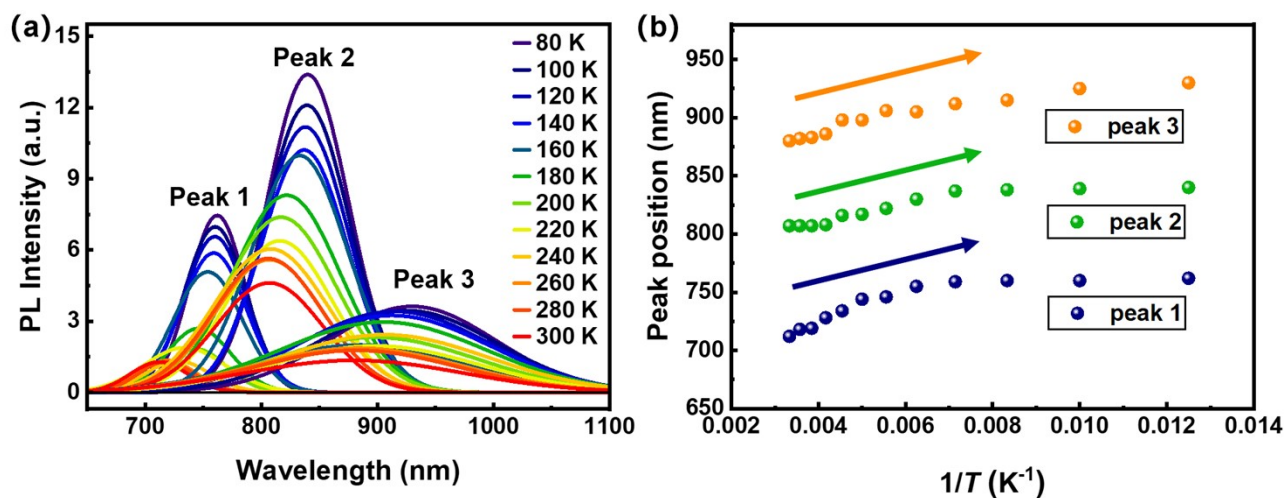

**Figure S2.** (a) Extracted emission bands of PL spectra of neat PTzBI-*dF* film at varies temperatures with three Gaussian-peaks fitting after excitation at 532 nm. (b) The correlations between PL emission peak positions and  $1/T$  for neat PTzBI-*dF* film.

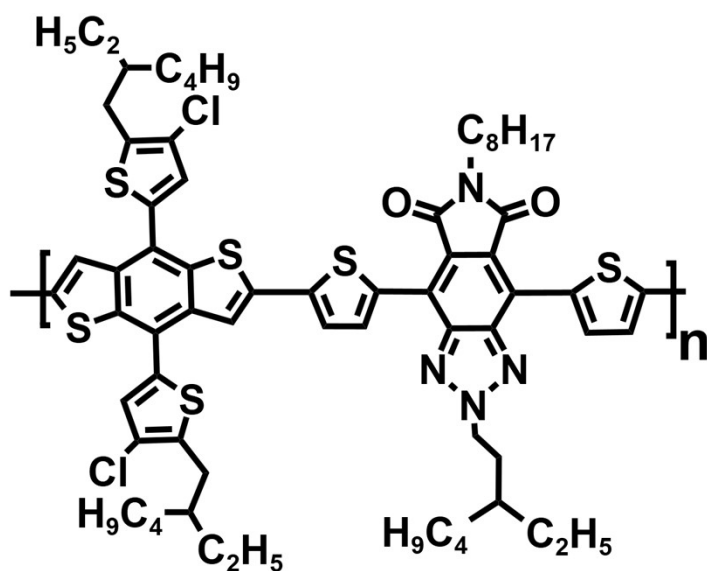

**Figure S3.** The molecule structure of PTzBI-Cl.

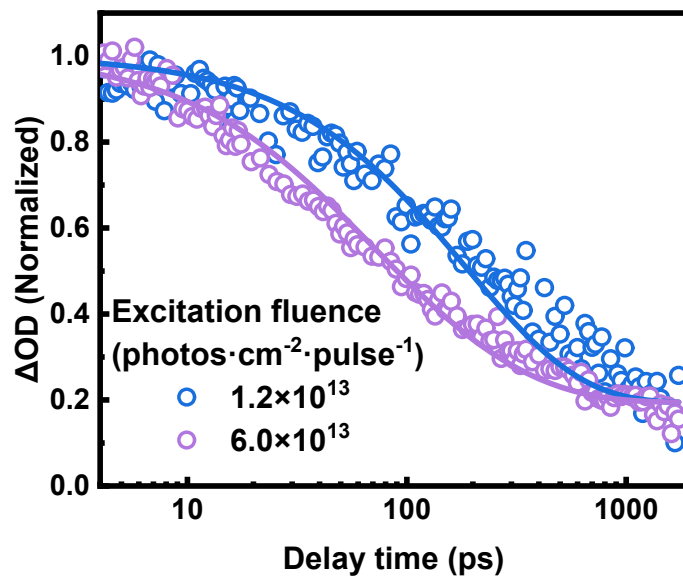

**Figure S4.** TA kinetics of PTzBI-Cl film probing at  $\sim 830$  nm under indicated excitation fluences.

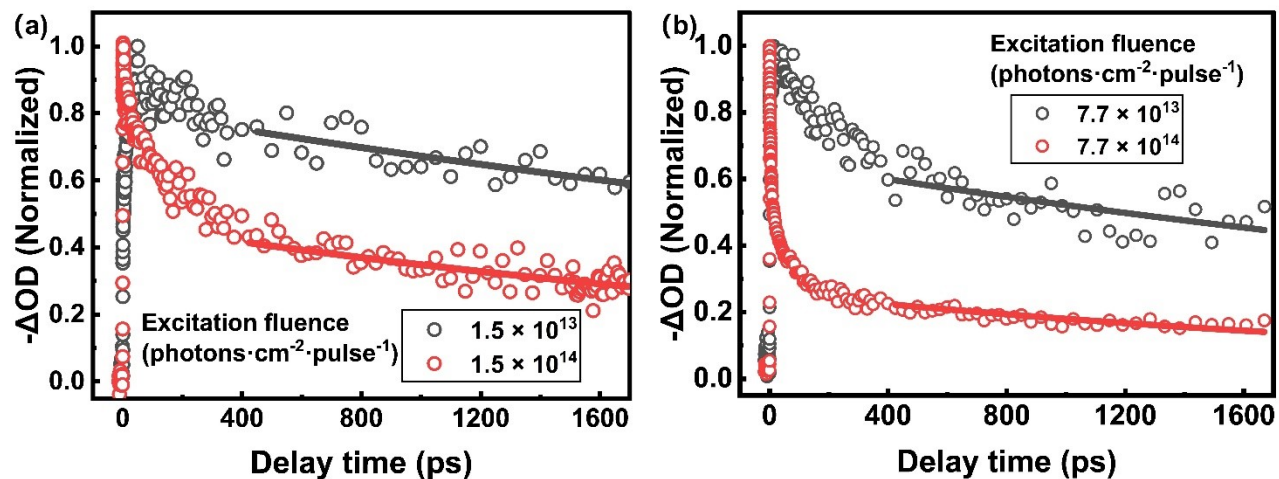

**Figure S5.** (a) The charge recombination kinetics at the probe wavelength of  $\sim 650$  nm for PTzBI-*dF*:Y6 blend film after photoexcitation at 800 nm with excitation fluences of  $1.5 \times 10^{13}$  and  $1.5 \times 10^{14}$  photons  $\cdot$  cm $^{-2}$   $\cdot$  pulse $^{-1}$ . (b) The charge recombination kinetics at the probe wavelength of  $\sim 630$  nm for PTzBI-Cl:Y6 blend film after photoexcitation at 800 nm with excitation fluences of  $7.7 \times 10^{13}$  and  $7.7 \times 10^{14}$  photons  $\cdot$  cm $^{-2}$   $\cdot$  pulse $^{-1}$ .

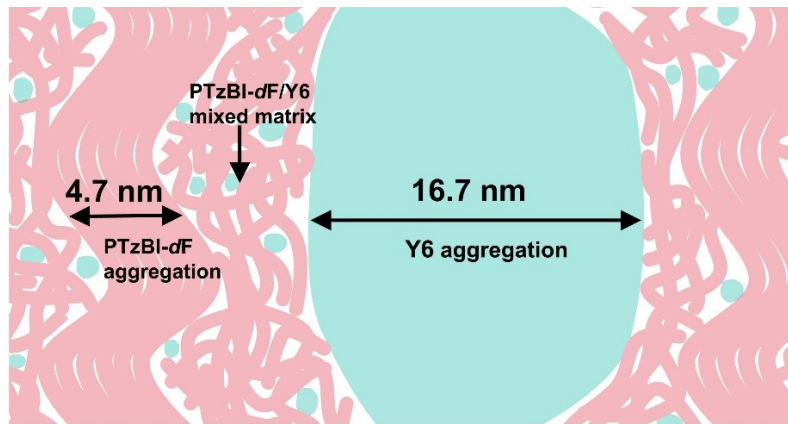

**Figure S6.** Morphology domains in PTzBI-*d*F:Y6 film.

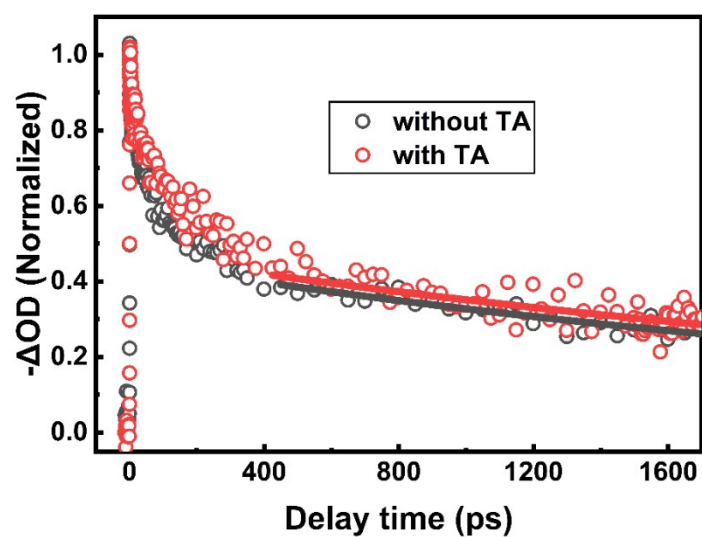

**Figure S7.** After excitation at 800 nm, TA kinetics of PTzBI-*d*F:Y6 films with and without thermal annealing at the probe wavelength of  $\sim 650$  nm with an excitation fluence of  $1.5 \times 10^{14}$  photons $\cdot$ cm $^{-2}$  $\cdot$ pulse $^{-1}$ .



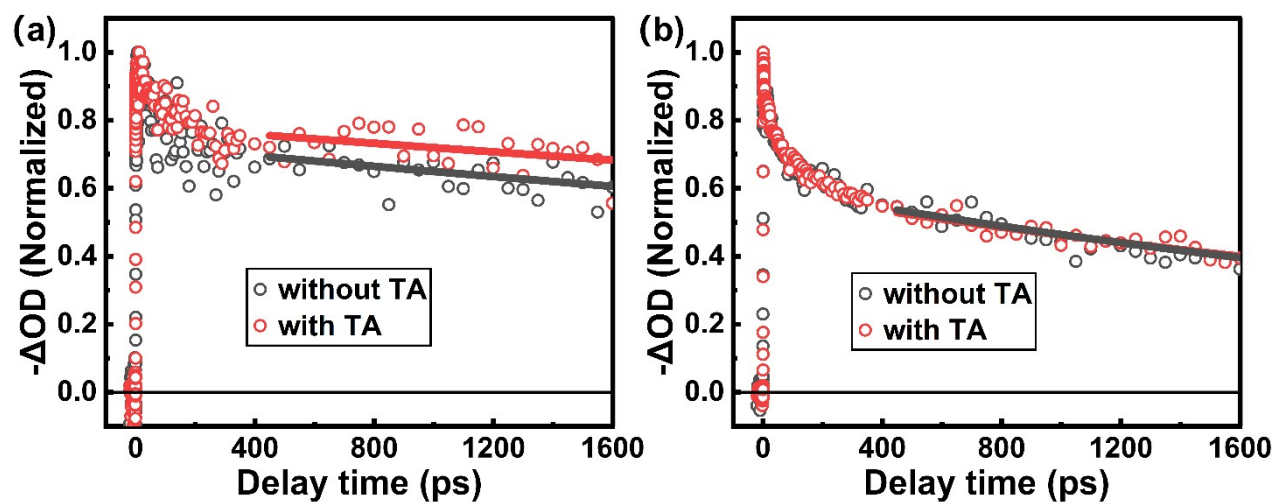

**Figure S8.** Charge recombination kinetics at the probe wavelength of  $\sim 845$  nm for PTzBI-*dF*:Y6 blend films after photoexcitation at 400 nm with various excitation fluences. The excitation fluences are  $2.1 \times 10^{13}$  and  $1.5 \times 10^{14}$  photons $\cdot$ cm $^{-2}$  $\cdot$ pulse $^{-1}$ .

## References

- 1 Z. Li, W. Zhang, X. Xu, Z. Genene, D. D. C. Rasi, W. Mammo, A. Yartsev, M. R. Andersson, R. A. J. Janssen and E. Wang, *Adv. Energy Mater.*, 2017, **7**, 1602722.
